# Supplementary material for: Morphology and crystal phase evolution induced performance enhancement of MnO2 grown on reduced graphene oxide for lithium ion batteries
Source: Royal Society of Chemistry journal article supplement (doi:10.1039/c5ta10614a), 2016-01-01
Supplement: c5ta10614a1.pdf [file c5ta10614a1.pdf]

## Supporting Information

### **Morphology and crystal phase evolution induced performance enhancement of MnO<sub>2</sub> grown on reduced graphene oxide for lithium ion batteries**

Yu Jiang,<sup>a</sup> Zhong-Jie Jiang,<sup>a,\*</sup> Bohong Chen,<sup>a</sup> Zhongqing Jiang,<sup>b</sup> Si Cheng,<sup>a</sup> Haibo Rong,<sup>a</sup> Jianlin Huang<sup>a</sup> and Meilin Liu<sup>a,c,\*</sup>

<sup>a</sup> *New Energy Research Institute, College of Environment and Energy, South China University of Technology, Guangzhou 510006, Guangdong, China. E-mail: zhongjiejiang1978@hotmail.com; esjiang@scut.edu.cn; Tel: +86-020-39381202.*

<sup>b</sup> *Department of Chemical Engineering, Ningbo University of Technology, Ningbo 315016, Zhejiang, China.*

<sup>c</sup> *School of Materials Science & Engineering, GA Institute of Technology, Atlanta, GA30332, USA. E-mail: meilin.liu@mse.gatech.edu; Tel: +1-404-894-6114.*

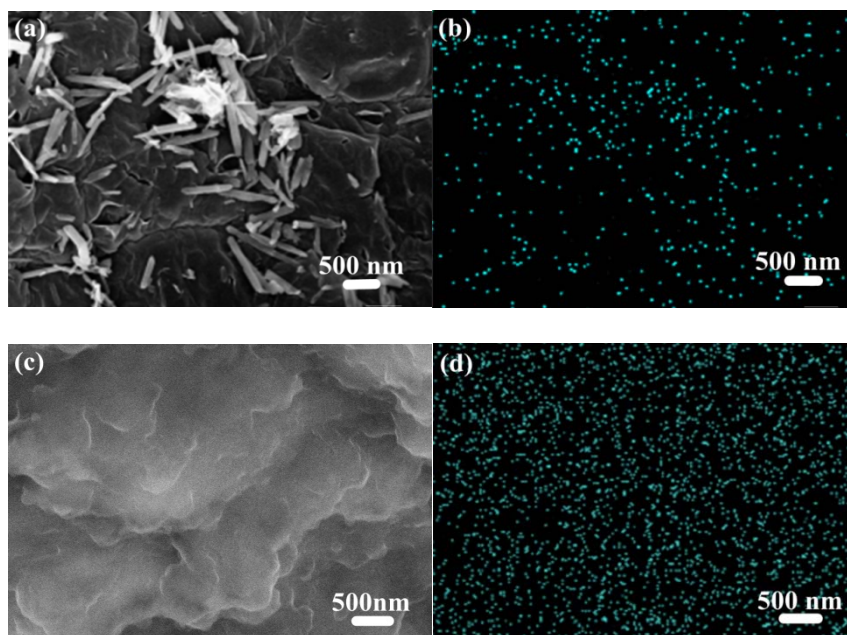

**Figure S1.** (a) SEM image and (b) corresponding elemental Mn mapping of the  $\text{MnO}_2\text{-NR/rGO}$  before cycling; (c) SEM image and (d) corresponding Elemental Mn mapping of the  $\text{MnO}_2\text{-NR/rGO}$  after 300 cycles at the current density of  $1.0 \text{ A g}^{-1}$ .
